# Supplementary figures and images for: Serum IFN‐γ Predicts the Therapeutic Effect of Mesenchymal Stem Cells Transplantation in Systemic Lupus Erythematosus Patients
Source: PubMed Central journal article supplement — Stem Cells Transl Med. 2017 Jul 29;6(9):1777–85. doi: 10.1002/sctm.17-0002 (PMC5689761; doi:10.1002/sctm.17-0002), 2017-07-29

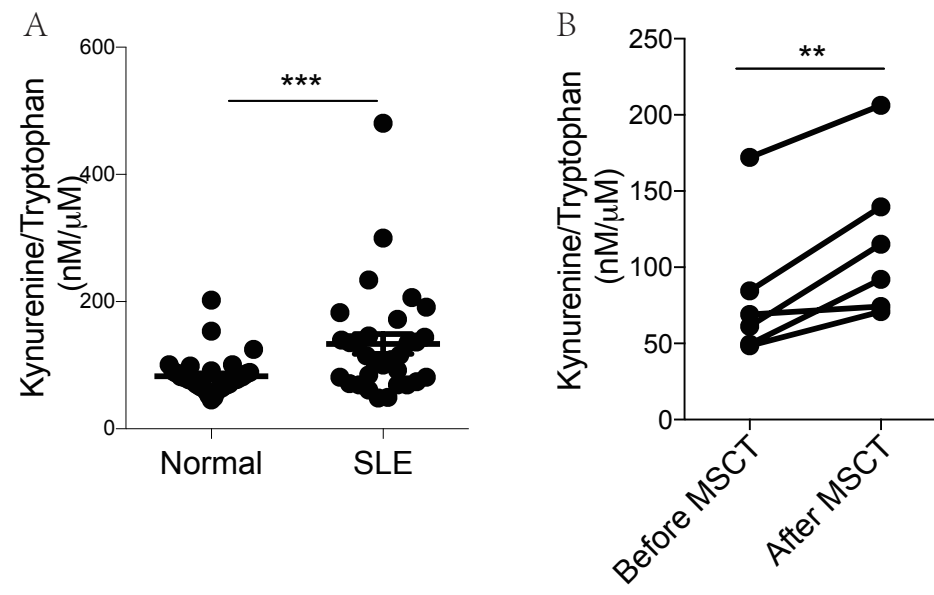

Supplementary Figure 3

Supplement: SCT3-6-1777-s003.pdf [file SCT3-6-1777-s003.pdf]
